# Supplementary material for: Superhydrophobic lotus-leaf-like surface made from reduced graphene oxide through soft-lithographic duplication
Source: Royal Society of Chemistry journal article supplement (doi:10.1039/c9ra10373b), 2020-01-01
Supplement: c9ra10373b1.pdf [file c9ra10373b1.pdf]

## Electronic Supplementary Information (ESI)

### **Superhydrophobic Lotus-leaf-like Surface Made from Reduced Graphene Oxide through Soft-lithographic Duplication**

*Xiawei Yun, Zhiyuan Xiong, Yaning He, and Xiaogong Wang\**

Department of Chemistry Engineering, Laboratory of Advanced Materials (MOE),

Tsinghua University, Beijing 100084, P. R. China

**Table S1.** Elemental analysis results of GO and ODA-RGO

| Sample  | C<br>(wt %) | O<br>(wt %) | N<br>(wt %) | C/O ratio<br>(atomic) |
|---------|-------------|-------------|-------------|-----------------------|
| GO      | 66.52       | 33.21       | 0.27        | 2.67                  |
| ODA-RGO | 90.48       | 6.36        | 3.16        | 18.99                 |

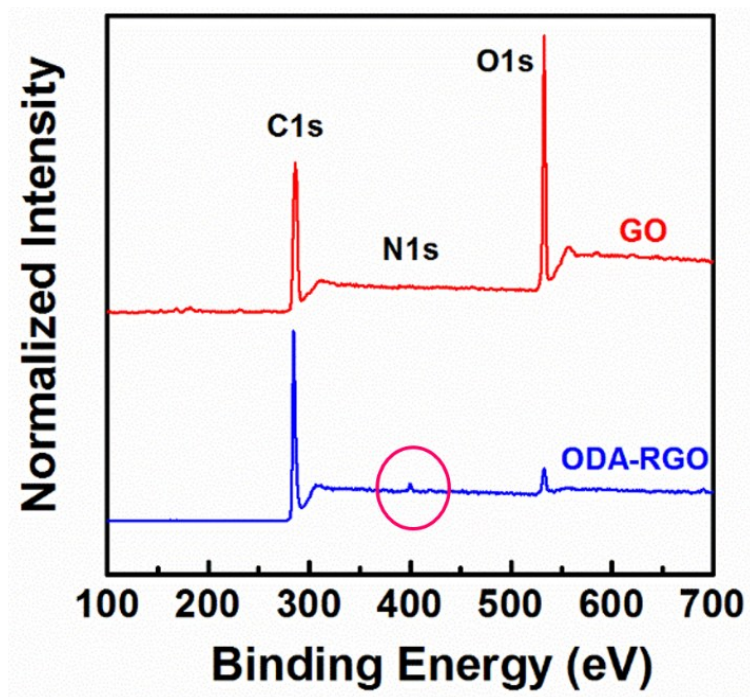

Fig. S1. Survey scanned XPS spectra of GO and ODA-RGO.

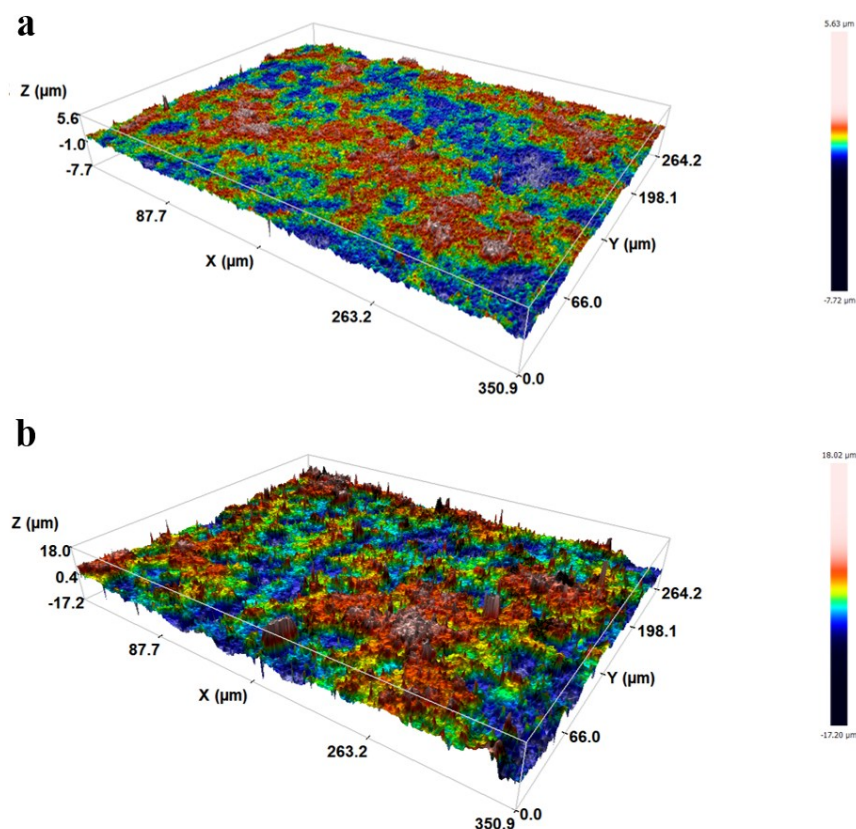

Fig. S2. Confocal microscope system 3D images of the drop-coated film surface and the printed lotus-leaf-like surface of ODA-RGO. The roughness values of the drop-coated film surface and printed lotus-leaf-like surface of ODA-RGO on glass slides are  $0.616 \mu\text{m}$  and  $3.116 \mu\text{m}$ .

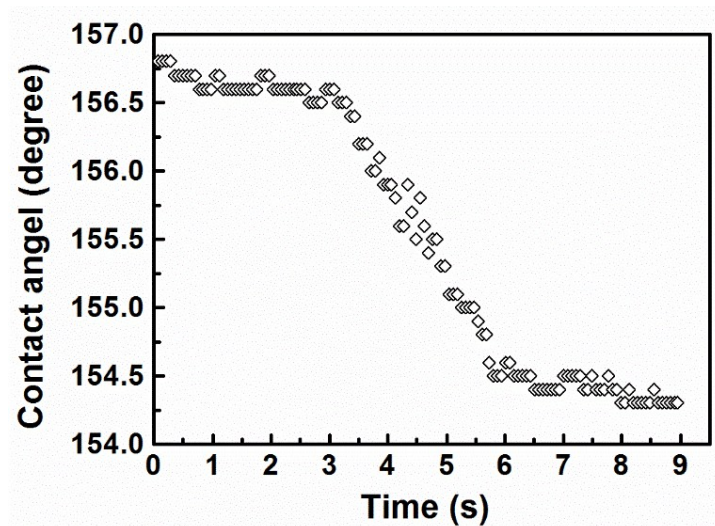

Fig. S3. Advancing and receding water contact angles of the ODA-RGO lotus-leaf-like surface.

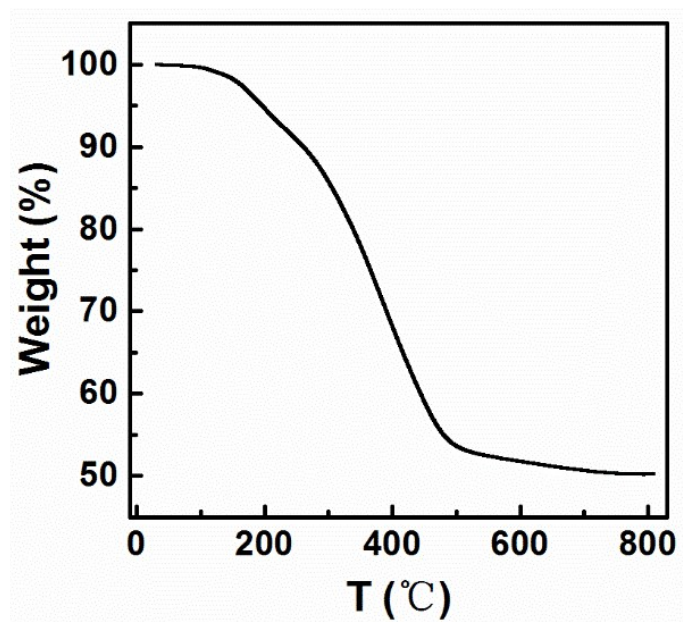

Fig. S4. Thermogravimetric analysis (TGA) of ODA-RGO.

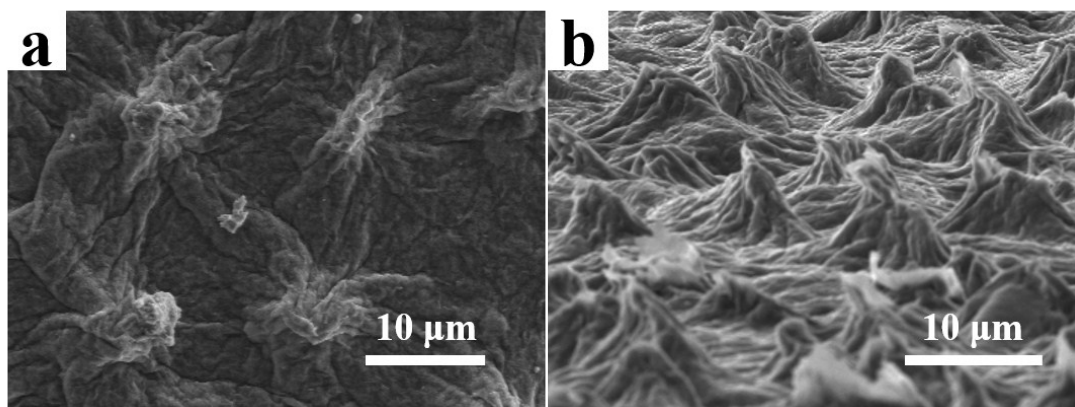

Fig. S5. Typical SEM images of the printed lotus-leaf-like surface after the heating treatment at 150 °C for 24 h, (a) top-view, (b) side-view.

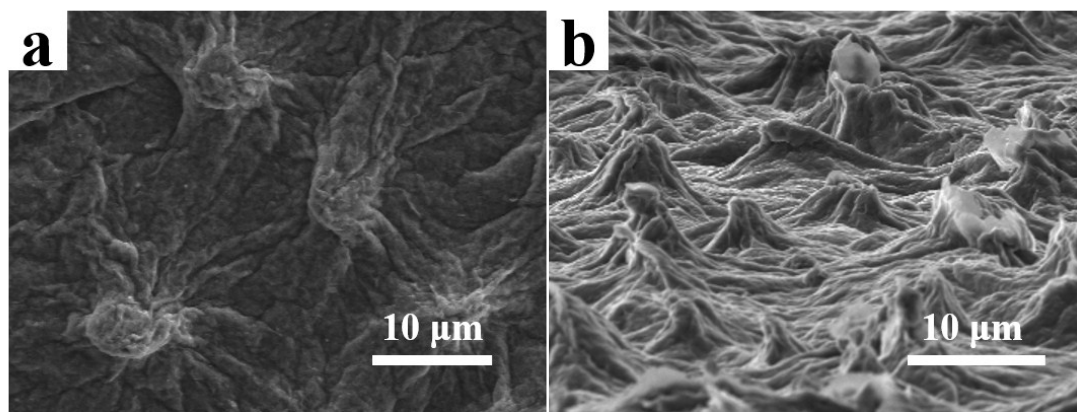

**Fig. S6.** Typical SEM images of the printed lotus-leaf-like surface after being immersed in the corrosive solution (pH = 0) for 12 h, (a) top-view, (b) section-view.
